# Supplementary material for: Innovation and growth in the UK pharmaceuticals: the case of product and marketing introductions
Source: Springer Nature journal article supplement (doi:10.1007/s11187-019-00307-w), 2020-04-21
Supplement: MOESM1 [file 17916796]

## B Online appendix

This on-line appendix is for the article titled, “*Innovation and growth in the UK pharmaceuticals: the case of product and marketing introductions*” by Bokhari, Mariuzzo and Bennato.

### B.1 Regression coefficients

A shorter version of this table is included in the main paper (see Table 4) where it shows the coefficient of selected variables. This appendix contains regression coefficients on all the variables.

Table B-1: FD Growth Models<sup>†</sup>

|                                                                                          | OLS                           |                               |                               | IV                            |                              |                              | (4) By sub-samples (IV)      |                              |                               |                               |
|------------------------------------------------------------------------------------------|-------------------------------|-------------------------------|-------------------------------|-------------------------------|------------------------------|------------------------------|------------------------------|------------------------------|-------------------------------|-------------------------------|
|                                                                                          | (1)                           | (2)                           | (3)                           | (4)                           | (5)                          | (6)                          | (4S)                         | (4M)                         | (4L)                          | (4X)                          |
| $s_{b,t-1}$ : Size<br>(Lagged Size of Bus. Unit)                                         | -1.06 <sup>a</sup><br>(0.016) | -1.05 <sup>a</sup><br>(0.016) | -1.05 <sup>a</sup><br>(0.034) | -0.76 <sup>a</sup><br>(0.099) | -0.71 <sup>a</sup><br>(0.12) | -0.71 <sup>a</sup><br>(0.12) | -0.77 <sup>a</sup><br>(0.13) | -0.77 <sup>a</sup><br>(0.18) | -1.12 <sup>a</sup><br>(0.35)  | -0.79 <sup>a</sup><br>(0.10)  |
| $p_{bt}$ : Products                                                                      | 0.28 <sup>a</sup><br>(0.041)  | 0.30 <sup>a</sup><br>(0.044)  | 0.27 <sup>a</sup><br>(0.043)  | 0.26 <sup>a</sup><br>(0.044)  | 0.25 <sup>a</sup><br>(0.070) | 0.25 <sup>a</sup><br>(0.070) | 0.58 <sup>a</sup><br>(0.10)  | 0.40 <sup>a</sup><br>(0.12)  | 0.15 <sup>b</sup><br>(0.057)  | 0.15 <sup>a</sup><br>(0.024)  |
| $v_{bt}$ : Variety                                                                       | 0.16 <sup>a</sup><br>(0.018)  | 0.15 <sup>a</sup><br>(0.018)  | 0.14 <sup>a</sup><br>(0.019)  | 0.14 <sup>a</sup><br>(0.019)  | 0.17 <sup>a</sup><br>(0.034) | 0.18 <sup>a</sup><br>(0.035) | 0.32 <sup>a</sup><br>(0.053) | 0.25 <sup>a</sup><br>(0.055) | 0.079 <sup>a</sup><br>(0.021) | 0.074 <sup>a</sup><br>(0.012) |
| $p_{bt}v_{bt}$ : Interaction<br>(Products $\times$ Variety) ( $\times 10^{-2}$ )         | -0.70 <sup>a</sup><br>(0.13)  | -0.70 <sup>a</sup><br>(0.13)  | -0.65 <sup>a</sup><br>(0.12)  | -0.63 <sup>a</sup><br>(0.12)  | -0.77 <sup>a</sup><br>(0.26) | -0.80 <sup>a</sup><br>(0.26) | -3.40 <sup>a</sup><br>(0.90) | -1.60 <sup>a</sup><br>(0.54) | -0.30 <sup>a</sup><br>(0.11)  | -0.31 <sup>a</sup><br>(0.064) |
| $g_{b,t-1}$ : Growth<br>(Lag 1)                                                          |                               |                               | -0.0030<br>(0.026)            | -0.28 <sup>a</sup><br>(0.098) | -0.34 <sup>a</sup><br>(0.11) | -0.34 <sup>a</sup><br>(0.11) | -0.36 <sup>a</sup><br>(0.12) | -0.19<br>(0.17)              | 0.22<br>(0.34)                | -0.29 <sup>a</sup><br>(0.098) |
| $x_{1bt}$ : Any PI Sales?<br>(1/0 Dummy, 1 if true)                                      | 0.12 <sup>a</sup><br>(0.026)  | 0.12 <sup>a</sup><br>(0.026)  | 0.12 <sup>a</sup><br>(0.025)  | 0.11 <sup>a</sup><br>(0.026)  | 0.13 <sup>a</sup><br>(0.035) | 0.13 <sup>a</sup><br>(0.035) | 0.16 <sup>c</sup><br>(0.085) | 0.11 <sup>a</sup><br>(0.037) | 0.081 <sup>b</sup><br>(0.032) | 0.099 <sup>a</sup><br>(0.023) |
| $x_{2bt}$ : Any generic products?<br>(1/0 Dummy, 1 if true)                              | -0.0039<br>(0.11)             | -0.099<br>(0.088)             | -0.071<br>(0.095)             | -0.057<br>(0.098)             | 0.031<br>(0.12)              | 0.034<br>(0.12)              | -0.41<br>(0.44)              | 0.24<br>(0.22)               | -0.13 <sup>b</sup><br>(0.052) | -0.049<br>(0.071)             |
| $x_{3bt}$ : Log Price<br>(Lag 2 Wt avg price of BU drugs)                                | 0.0072<br>(0.027)             | -0.0016<br>(0.024)            | 0.050 <sup>b</sup><br>(0.024) | 0.027<br>(0.024)              | 0.017<br>(0.034)             | 0.020<br>(0.033)             | -0.026<br>(0.028)            | 0.12 <sup>c</sup><br>(0.068) | 0.052<br>(0.032)              | 0.040 <sup>c</sup><br>(0.023) |
| $x_{1c,t-1}$ : Products in Class ( $\times 10^{-2}$ )<br>(Lag 1 of Products by Others)   | -0.53<br>(0.42)               | -0.63<br>(0.45)               | -0.71<br>(0.46)               | -0.59<br>(0.46)               | -0.37<br>(0.71)              | -0.36<br>(0.71)              | -0.54<br>(1.30)              | 0.085<br>(0.940)             | -1.20 <sup>b</sup><br>(0.510) | -0.74 <sup>c</sup><br>(0.390) |
| $x_{2c,t-1}$ : Varieties in Class ( $\times 10^{-2}$ )<br>(Lag 1 of Varieties by Others) | -0.11<br>(0.19)               | -0.033<br>(0.19)              | 0.014<br>(0.20)               | -0.019<br>(0.19)              | -0.46<br>(0.34)              | -0.42<br>(0.34)              | 0.41<br>(0.48)               | 0.48<br>(0.45)               | -0.32 <sup>c</sup><br>(0.19)  | 0.09<br>(0.18)                |
| $x_{3c,t-1}$ : HHI<br>(Lag 1)                                                            | 0.34 <sup>b</sup><br>(0.17)   | 0.30 <sup>c</sup><br>(0.18)   | 0.41 <sup>b</sup><br>(0.18)   | 0.41 <sup>b</sup><br>(0.18)   | 0.30<br>(0.22)               | 0.30<br>(0.22)               | 0.28<br>(0.18)               | 0.68<br>(0.45)               | 0.25<br>(0.46)                | 0.40 <sup>b</sup><br>(0.17)   |
| $x_{4c,t-1}$ : Firms in Class<br>(Lag 1) ( $\times 10^{-2}$ )                            | 0.87<br>(0.92)                | 0.61<br>(0.90)                | 0.57<br>(0.91)                | 0.30<br>(0.92)                | -0.10<br>(1.20)              | -0.061<br>(1.30)             | 0.96<br>(2.50)               | -1.30<br>(1.70)              | 0.80<br>(1.10)                | 0.047<br>(0.790)              |
| (Lags)                                                                                   |                               |                               |                               |                               |                              |                              |                              |                              |                               |                               |
| Observations                                                                             | 48,799                        | 44,856                        | 42,994                        | 42,994                        | 23,035                       | 23,035                       | 12,567                       | 14,815                       | 15,612                        | 38,345                        |
| R-squared                                                                                | 0.510                         | 0.507                         | 0.508                         | 0.502                         | 0.512                        | 0.512                        | 0.556                        | 0.461                        | 0.425                         | 0.560                         |

<sup>†</sup>Standard errors are in parenthesis and clustered by business unit (firm-ATC4 combination). Superscripts *a, b, c* indicate significance at 1%, 5% and 10%, respectively.

Specification (1) does not include any lags, (2) is a distributed lag model and includes up to four lags of products, varieties and interactions. Specification (3) is an augmented distributed lag model that also includes four lags of the dependent variable (i.e., growth). Specification (4) treats only the first lag of growth as endogenous, (5) treats the first lag of growth, as well as products, and varieties, and their interaction and all four lags of each of these as endogenous variables (total 16), and specification (6) treats the first lag of growth and only the contemporaneous values of products, varieties and interaction as endogenous variables (total of 4 endogenous variables). Specifications (4S), (4M), and (4L) are same as (4), but on sub-samples by initial size of business unit being (s)mall, (m)edium and (l)arge, while (4X) restricts (4) to BUs that do not exit the sample.

Table B-1: FD Growth Models<sup>†</sup>

|                                                                                               | OLS                |                                |                                | IV                             |                                |                                | (4) By sub-samples (IV)       |                               |                     |                                |
|-----------------------------------------------------------------------------------------------|--------------------|--------------------------------|--------------------------------|--------------------------------|--------------------------------|--------------------------------|-------------------------------|-------------------------------|---------------------|--------------------------------|
|                                                                                               | (1)                | (2)                            | (3)                            | (4)                            | (5)                            | (6)                            | (4S)                          | (4M)                          | (4L)                | (4X)                           |
| $g_{b,t-2}$ : Growth<br>(Lag 2)                                                               |                    |                                | -0.13 <sup>a</sup><br>(0.033)  | -0.34 <sup>a</sup><br>(0.087)  | -0.42 <sup>a</sup><br>(0.093)  | -0.42 <sup>a</sup><br>(0.092)  | -0.41 <sup>a</sup><br>(0.12)  | -0.26 <sup>b</sup><br>(0.13)  | 0.059<br>(0.24)     | -0.37 <sup>a</sup><br>(0.086)  |
| $g_{b,t-3}$ : Growth<br>(Lag 3)                                                               |                    |                                | -0.15 <sup>a</sup><br>(0.033)  | -0.28 <sup>a</sup><br>(0.065)  | -0.35 <sup>a</sup><br>(0.072)  | -0.35 <sup>a</sup><br>(0.072)  | -0.33 <sup>a</sup><br>(0.093) | -0.21 <sup>b</sup><br>(0.088) | -0.029<br>(0.15)    | -0.32 <sup>a</sup><br>(0.066)  |
| $g_{b,t-4}$ : Growth<br>(Lag 4)                                                               |                    |                                | -0.019<br>(0.012)              | -0.076 <sup>a</sup><br>(0.025) | -0.11 <sup>a</sup><br>(0.030)  | -0.11 <sup>a</sup><br>(0.030)  | -0.11 <sup>a</sup><br>(0.031) | -0.018<br>(0.052)             | 0.063<br>(0.065)    | -0.082 <sup>a</sup><br>(0.027) |
| $p_{b,t-1}$ : Products<br>(Lag 1)                                                             |                    | 0.10 <sup>a</sup><br>(0.021)   | 0.089 <sup>a</sup><br>(0.021)  | 0.081 <sup>a</sup><br>(0.021)  | 0.042<br>(0.032)               | 0.077 <sup>a</sup><br>(0.026)  | 0.22 <sup>b</sup><br>(0.091)  | 0.15 <sup>b</sup><br>(0.070)  | 0.019<br>(0.017)    | 0.074 <sup>a</sup><br>(0.021)  |
| $p_{b,t-2}$ : Products<br>(Lag 2)                                                             |                    | 0.030<br>(0.025)               | 0.059 <sup>b</sup><br>(0.023)  | 0.044 <sup>b</sup><br>(0.022)  | 0.11 <sup>b</sup><br>(0.056)   | 0.070 <sup>b</sup><br>(0.029)  | 0.14 <sup>b</sup><br>(0.061)  | 0.058<br>(0.060)              | 0.028<br>(0.030)    | 0.031 <sup>c</sup><br>(0.017)  |
| $p_{b,t-3}$ : Products<br>(Lag 3)                                                             |                    | -0.018<br>(0.016)              | -0.00073<br>(0.016)            | -0.022<br>(0.019)              | -0.033<br>(0.025)              | -0.037 <sup>c</sup><br>(0.021) | -0.033<br>(0.069)             | -0.015<br>(0.053)             | 0.0095<br>(0.019)   | -0.026<br>(0.016)              |
| $p_{b,t-4}$ : Products<br>(Lag 4)                                                             |                    | 0.050<br>(0.031)               | -0.00099<br>(0.019)            | -0.028<br>(0.023)              | -0.021<br>(0.031)              | -0.044 <sup>c</sup><br>(0.024) | -0.058<br>(0.082)             | 0.038<br>(0.053)              | 0.0038<br>(0.018)   | -0.041 <sup>c</sup><br>(0.022) |
| $v_{b,t-1}$ : Variety<br>(Lag 1)                                                              |                    | 0.033 <sup>a</sup><br>(0.0088) | 0.029 <sup>a</sup><br>(0.0086) | 0.021 <sup>b</sup><br>(0.0088) | 0.020<br>(0.014)               | 0.025 <sup>b</sup><br>(0.012)  | 0.048<br>(0.033)              | 0.082 <sup>a</sup><br>(0.031) | 0.010<br>(0.0090)   | 0.022 <sup>a</sup><br>(0.0075) |
| $v_{b,t-2}$ : Variety<br>(Lag 2) ( $\times 10^{-2}$ )                                         |                    | 0.90<br>(0.79)                 | 1.80 <sup>b</sup><br>(0.89)    | 0.66<br>(0.90)                 | 1.90<br>(2.30)                 | 0.082<br>(1.20)                | 2.80<br>(2.80)                | 2.40<br>(2.20)                | 1.50<br>(1.30)      | 0.50<br>(0.61)                 |
| $v_{b,t-3}$ : Variety<br>(Lag 3) ( $\times 10^{-2}$ )                                         |                    | 0.55<br>(0.61)                 | 0.42<br>(0.65)                 | -0.79<br>(0.81)                | -1.40<br>(1.10)                | -1.40 <sup>c</sup><br>(0.85)   | 0.40<br>(3.40)                | 0.30<br>(1.90)                | 0.17<br>(0.79)      | -1.20<br>(0.73)                |
| $v_{b,t-4}$ : Variety<br>(Lag 4) ( $\times 10^{-2}$ )                                         |                    | 1.90 <sup>a</sup><br>(0.66)    | 0.025<br>(0.66)                | -1.20<br>(0.80)                | 0.14<br>(1.20)                 | -0.68<br>(0.88)                | -2.10<br>(3.20)               | 0.48<br>(2.00)                | 0.66<br>(0.73)      | -1.70 <sup>b</sup><br>(0.70)   |
| $p_{b,t-1}v_{3,t-1}$ : Interaction<br>(Products $\times$ Variety, Lag 1) ( $\times 10^{-2}$ ) |                    | -0.23 <sup>a</sup><br>(0.054)  | -0.20 <sup>a</sup><br>(0.051)  | -0.17 <sup>a</sup><br>(0.049)  | -0.060<br>(0.12)               | -0.21 <sup>a</sup><br>(0.075)  | -1.20<br>(0.77)               | -0.88 <sup>c</sup><br>(0.51)  | -0.034<br>(0.037)   | -0.14 <sup>a</sup><br>(0.043)  |
| $p_{2,t-2}v_{3,t-2}$ : Interaction<br>(Products $\times$ Variety, Lag 2) ( $\times 10^{-2}$ ) |                    | -0.082 <sup>c</sup><br>(0.047) | -0.13 <sup>a</sup><br>(0.049)  | -0.090 <sup>b</sup><br>(0.045) | -0.24<br>(0.17)                | -0.13 <sup>c</sup><br>(0.064)  | -0.60<br>(0.59)               | -0.56 <sup>a</sup><br>(0.20)  | -0.062<br>(0.060)   | -0.070 <sup>b</sup><br>(0.033) |
| $p_{2,t-3}v_{3,t-3}$ : Interaction<br>(Products $\times$ Variety, Lag 3) ( $\times 10^{-2}$ ) |                    | 0.036<br>(0.037)               | 0.0071<br>(0.037)              | 0.062<br>(0.043)               | 0.082<br>(0.084)               | 0.10 <sup>c</sup><br>(0.054)   | -0.57<br>(0.63)               | 0.051<br>(0.27)               | -0.0046<br>(0.038)  | 0.068 <sup>c</sup><br>(0.036)  |
| $p_{2,t-4}v_{3,t-4}$ : Interaction<br>(Products $\times$ Variety, Lag 4) ( $\times 10^{-2}$ ) |                    | -0.11 <sup>c</sup><br>(0.065)  | 0.0035<br>(0.042)              | 0.064<br>(0.049)               | -0.059<br>(0.093)              | 0.078<br>(0.057)               | -0.51<br>(0.67)               | -0.23<br>(0.22)               | -9.0e-04<br>(0.033) | 0.087 <sup>b</sup><br>(0.042)  |
| $\tau_{1t}$ : Yr 2004<br>(1/0 Dummy, 1 if true)                                               | 0.0056<br>(0.012)  |                                |                                | -0.014<br>(0.023)              | -0.068 <sup>b</sup><br>(0.031) | -0.066 <sup>b</sup><br>(0.032) | 0.020<br>(0.063)              | -0.048<br>(0.037)             | 0.0083<br>(0.029)   | 0.025<br>(0.023)               |
| $\tau_{2t}$ : Yr 2005<br>(1/0 Dummy, 1 if true)                                               |                    | -0.029 <sup>c</sup><br>(0.016) | -0.016<br>(0.018)              | -0.028<br>(0.018)              | -0.071 <sup>a</sup><br>(0.022) | -0.070 <sup>a</sup><br>(0.022) | -0.0042<br>(0.036)            | -0.047<br>(0.032)             | -0.024<br>(0.027)   | 0.0086<br>(0.017)              |
| $\tau_{3t}$ : Yr 2006<br>(1/0 Dummy, 1 if true)                                               | 0.017<br>(0.013)   | -0.019<br>(0.016)              | -0.0063<br>(0.017)             | -0.021<br>(0.019)              | -0.071 <sup>a</sup><br>(0.023) | -0.070 <sup>a</sup><br>(0.023) | -0.018<br>(0.040)             | -0.044<br>(0.033)             | -0.0093<br>(0.024)  | 0.038 <sup>b</sup><br>(0.018)  |
| $\tau_{4t}$ : Yr 2007                                                                         | 0.023 <sup>b</sup> | -0.011                         | 0.00097                        | -0.017                         | -0.074 <sup>a</sup>            | -0.072 <sup>a</sup>            | -0.011                        | -0.027                        | -0.012              | 0.016                          |
| Observations                                                                                  | 48,799             | 44,856                         | 42,994                         | 42,994                         | 23,035                         | 23,035                         | 12,567                        | 14,815                        | 15,612              | 38,345                         |
| R-squared                                                                                     | 0.510              | 0.507                          | 0.508                          | 0.502                          | 0.512                          | 0.512                          | 0.556                         | 0.461                         | 0.425               | 0.560                          |

<sup>†</sup>Standard errors are in parenthesis and clustered by business unit (firm-ATC4 combination). Superscripts *a, b, c* indicate significance at 1%, 5% and 10%, respectively.

Specification (1) does not include any lags, (2) is a distributed lag model and includes up to four lags of products, varieties and interactions. Specification (3) is an augmented distributed lag model that also includes four lags of the dependent variable (i.e., growth). Specification (4) treats only the first lag of growth as endogenous, (5) treats the first lag of growth, as well as products, and varieties, and their interaction and all four lags of each of these as endogenous variables (total 16), and specification (6) treats the first lag of growth and only the contemporaneous values of products, varieties and interaction as endogenous variables (total of 4 endogenous variables). Specifications (4S), (4M), and (4L) are same as (4), but on sub-samples by initial size of business unit being (s)mall, (m)edium and (l)arge, while (4X) restricts (4) to BUs that do not exit the sample.

Table B-1: FD Growth Models<sup>†</sup>

|                                                  | OLS                            |                                |                                | IV                             |                                |                                | (4) By sub-samples (IV)        |                                |                                |                                |
|--------------------------------------------------|--------------------------------|--------------------------------|--------------------------------|--------------------------------|--------------------------------|--------------------------------|--------------------------------|--------------------------------|--------------------------------|--------------------------------|
|                                                  | (1)                            | (2)                            | (3)                            | (4)                            | (5)                            | (6)                            | (4S)                           | (4M)                           | (4L)                           | (4X)                           |
| (1/0 Dummy, 1 if true)                           | (0.011)                        | (0.014)                        | (0.017)                        | (0.018)                        | (0.023)                        | (0.023)                        | (0.036)                        | (0.032)                        | (0.026)                        | (0.017)                        |
| $\tau_{5t}$ : Yr 2008<br>(1/0 Dummy, 1 if true)  | 0.023 <sup>c</sup><br>(0.012)  | -0.011<br>(0.015)              | -0.0018<br>(0.017)             | -0.016<br>(0.018)              | -0.069 <sup>a</sup><br>(0.023) | -0.067 <sup>a</sup><br>(0.023) | 0.017<br>(0.039)               | -0.037<br>(0.031)              | -0.023<br>(0.025)              | 0.021<br>(0.017)               |
| $\tau_{6t}$ : Yr 2009<br>(1/0 Dummy, 1 if true)  | 0.0037<br>(0.012)              | -0.026 <sup>c</sup><br>(0.015) | -0.010<br>(0.017)              | -0.025<br>(0.018)              | -0.077 <sup>a</sup><br>(0.022) | -0.075 <sup>a</sup><br>(0.022) | -0.0099<br>(0.037)             | -0.058 <sup>c</sup><br>(0.032) | -0.013<br>(0.023)              | 0.0099<br>(0.017)              |
| $\tau_{7t}$ : Yr 2010<br>(1/0 Dummy, 1 if true)  | 0.0083<br>(0.011)              | -0.019<br>(0.015)              | -0.0050<br>(0.017)             | -0.017<br>(0.018)              | -0.071 <sup>a</sup><br>(0.024) | -0.070 <sup>a</sup><br>(0.024) | -0.0031<br>(0.035)             | -0.033<br>(0.033)              | -0.0099<br>(0.026)             | 0.012<br>(0.017)               |
| $\tau_{8t}$ : Yr 2011<br>(1/0 Dummy, 1 if true)  | -0.0097<br>(0.011)             | -0.035 <sup>b</sup><br>(0.015) | -0.016<br>(0.016)              | -0.030 <sup>c</sup><br>(0.018) | -0.075 <sup>a</sup><br>(0.023) | -0.074 <sup>a</sup><br>(0.023) | -0.012<br>(0.037)              | -0.040<br>(0.032)              | -0.030<br>(0.026)              | 0.0046<br>(0.017)              |
| $\tau_{9t}$ : Yr 2012<br>(1/0 Dummy, 1 if true)  | 0.022 <sup>c</sup><br>(0.012)  | -0.0098<br>(0.014)             | 0.0021<br>(0.017)              | -0.0086<br>(0.018)             | -0.058 <sup>b</sup><br>(0.024) | -0.055 <sup>b</sup><br>(0.024) | 0.030<br>(0.036)               | -0.039<br>(0.032)              | -0.017<br>(0.025)              | 0.020<br>(0.017)               |
| $\tau_{10t}$ : Yr 2013<br>(1/0 Dummy, 1 if true) | 0.022<br>(0.018)               | -0.0015<br>(0.022)             | 0.012<br>(0.023)               |                                |                                |                                |                                |                                |                                |                                |
| $\tau_{11t}$ : Qtr 2<br>(1/0 Dummy, 1 if true)   | 0.065 <sup>a</sup><br>(0.0087) | 0.081 <sup>a</sup><br>(0.0088) | 0.072 <sup>a</sup><br>(0.0084) | 0.071 <sup>a</sup><br>(0.0084) | 0.081 <sup>a</sup><br>(0.012)  | 0.081 <sup>a</sup><br>(0.012)  | 0.031 <sup>c</sup><br>(0.017)  | 0.085 <sup>a</sup><br>(0.016)  | 0.088 <sup>a</sup><br>(0.012)  | 0.060 <sup>a</sup><br>(0.0071) |
| $\tau_{12t}$ : Qtr 3<br>(1/0 Dummy, 1 if true)   | 0.065 <sup>a</sup><br>(0.013)  | 0.055 <sup>a</sup><br>(0.012)  | 0.042 <sup>a</sup><br>(0.0081) | 0.043 <sup>a</sup><br>(0.0082) | 0.045 <sup>a</sup><br>(0.011)  | 0.045 <sup>a</sup><br>(0.011)  | 0.045 <sup>b</sup><br>(0.018)  | 0.044 <sup>a</sup><br>(0.016)  | 0.027 <sup>b</sup><br>(0.013)  | 0.037 <sup>a</sup><br>(0.0069) |
| $\tau_{13t}$ : Qtr 4<br>(1/0 Dummy, 1 if true)   | 0.053 <sup>a</sup><br>(0.011)  | 0.053 <sup>a</sup><br>(0.011)  | 0.050 <sup>a</sup><br>(0.0087) | 0.050 <sup>a</sup><br>(0.0088) | 0.060 <sup>a</sup><br>(0.012)  | 0.060 <sup>a</sup><br>(0.012)  | 0.039 <sup>c</sup><br>(0.021)  | 0.071 <sup>a</sup><br>(0.015)  | 0.033 <sup>a</sup><br>(0.011)  | 0.040 <sup>a</sup><br>(0.0075) |
| $x_{0t}$ : Constant                              | -0.094 <sup>a</sup><br>(0.011) | -0.070 <sup>a</sup><br>(0.014) | -0.082 <sup>a</sup><br>(0.017) | -0.067 <sup>a</sup><br>(0.015) | -0.019<br>(0.018)              | -0.020<br>(0.018)              | -0.084 <sup>a</sup><br>(0.030) | -0.064 <sup>b</sup><br>(0.027) | -0.058 <sup>b</sup><br>(0.025) | -0.072 <sup>a</sup><br>(0.015) |
| Observations                                     | 48,799                         | 44,856                         | 42,994                         | 42,994                         | 23,035                         | 23,035                         | 12,567                         | 14,815                         | 15,612                         | 38,345                         |
| R-squared                                        | 0.510                          | 0.507                          | 0.508                          | 0.502                          | 0.512                          | 0.512                          | 0.556                          | 0.461                          | 0.425                          | 0.560                          |

<sup>†</sup>Standard errors are in parenthesis and clustered by business unit (firm-ATC4 combination). Superscripts *a, b, c* indicate significance at 1%, 5% and 10%, respectively.

Specification (1) does not include any lags, (2) is a distributed lag model and includes up to four lags of products, varieties and interactions. Specification (3) is an augmented distributed lag model that also includes four lags of the dependent variable (i.e., growth). Specification (4) treats only the first lag of growth as endogenous, (5) treats the first lag of growth, as well as products, and varieties, and their interaction and all four lags of each of these as endogenous variables (total 16), and specification (6) treats the first lag of growth and only the contemporaneous values of products, varieties and interaction as endogenous variables (total of 4 endogenous variables). Specifications (4S), (4M), and (4L) are same as (4), but on sub-samples by initial size of business unit being (s)mall, (m)edium and (l)arge, while (4X) restricts (4) to BUs that do not exit the sample.

**Table B-2** First stage and other tests for instruments

|                                               | (4)                      | (5)       | (6)       | (4S)      | (4M)      | (4L)      | (4X)       |
|-----------------------------------------------|--------------------------|-----------|-----------|-----------|-----------|-----------|------------|
| <u>Weak instruments tests</u>                 |                          |           |           |           |           |           |            |
| Endogenous Variable(s)                        | First-stage F-statistics |           |           |           |           |           |            |
| $g_{b,t-1}$ : Growth (Lag 1)                  | 59.42                    | 13.45     | 30.39     | 37.97     | 15.19     | 15.19     | 31.18      |
| $p_{b,t}$ : Products                          |                          | 37.80     | 69.33     |           |           |           |            |
| $v_{b,t}$ : Variety                           |                          | 80.94     | 218.1     |           |           |           |            |
| $p_{bt} * v_{bt}$ : Interaction               |                          | 32.26     | 64.16     |           |           |           |            |
| $p_{b,t-1}$ : Products (Lag 1)                |                          | 64.98     |           |           |           |           |            |
| $p_{b,t-2}$ : Products (Lag 2)                |                          | 86.81     |           |           |           |           |            |
| $p_{b,t-3}$ : Products (Lag 3)                |                          | 84.42     |           |           |           |           |            |
| $p_{b,t-4}$ : Products (Lag 4)                |                          | 91.59     |           |           |           |           |            |
| $v_{b,t-1}$ : Variety (Lag1)                  |                          | 76.66     |           |           |           |           |            |
| $v_{b,t-2}$ : Variety (Lag2)                  |                          | 74.63     |           |           |           |           |            |
| $v_{b,t-3}$ : Variety (Lag3)                  |                          | 70.51     |           |           |           |           |            |
| $v_{b,t-4}$ : Variety (Lag4)                  |                          | 72.31     |           |           |           |           |            |
| $p_{b,t-1} * v_{b,t-1}$ : Interaction (Lag 1) |                          | 37.18     |           |           |           |           |            |
| $p_{b,t-2} * v_{b,t-2}$ : Interaction (Lag 2) |                          | 55.30     |           |           |           |           |            |
| $p_{b,t-3} * v_{b,t-3}$ : Interaction (Lag 3) |                          | 39.25     |           |           |           |           |            |
| $p_{b,t-4} * v_{b,t-4}$ : Interaction (Lag 4) |                          | 34.47     |           |           |           |           |            |
| <u>Under and Over Identification Tests</u>    |                          |           |           |           |           |           |            |
| (Ho: Model is under identified)               |                          |           |           |           |           |           |            |
| Under-id $\chi^2(df)$                         | 169.01 (1)               | 139.6 (6) | 133.9 (2) | 92.62 (1) | 56.59 (1) | 22.28 (1) | 121.54 (1) |
| P-value                                       | < .000                   | < .000    | < .000    | < .000    | < .000    | < .000    | < .000     |
| (Ho: Model is over identified)                |                          |           |           |           |           |           |            |
| Over-id $\chi^2(df)$                          | .                        | 6.06 (5)  | 1.54 (1)  | .         | .         | .         | .          |
| P-value                                       | .                        | 0.306     | 0.215     | .         | .         | .         | .          |

Table B-3 Instruments test w./ alternative clustering

| <b>Clustering at the Firm level</b>           |                          |           |           |           |           |           |           |
|-----------------------------------------------|--------------------------|-----------|-----------|-----------|-----------|-----------|-----------|
|                                               | (4)                      | (5)       | (6)       | (4S)      | (6M)      | (6L)      | (6X)      |
| Endogenous Variable(s)                        | First-stage F-statistics |           |           |           |           |           |           |
| $g_{b,t-1}$ : Growth (Lag 1)                  | 34.06                    | 59.49     | 36.17     | 34.13     | 12.08     | 14.58     | 14.84     |
| $p_{b,t}$ : Products                          |                          | 926.4     | 211.4     |           |           |           |           |
| $v_{b,t}$ : Variety                           |                          | 3804      | 131.1     |           |           |           |           |
| $p_{bt} * v_{bt}$ : Interaction               |                          | 1426      | 172.1     |           |           |           |           |
| $p_{b,t-1}$ : Products (Lag 1)                |                          | 1701      |           |           |           |           |           |
| $p_{b,t-2}$ : Products (Lag 2)                |                          | 1663      |           |           |           |           |           |
| $p_{b,t-3}$ : Products (Lag 3)                |                          | 2762      |           |           |           |           |           |
| $p_{b,t-4}$ : Products (Lag 4)                |                          | 1094      |           |           |           |           |           |
| $v_{b,t-1}$ :Variety (Lag1)                   |                          | 9204      |           |           |           |           |           |
| $v_{b,t-2}$ :Variety (Lag2)                   |                          | 5728      |           |           |           |           |           |
| $v_{b,t-3}$ :Variety (Lag3)                   |                          | 808.9     |           |           |           |           |           |
| $v_{b,t-4}$ :Variety (Lag4)                   |                          | 505.6     |           |           |           |           |           |
| $p_{b,t-1} * v_{b,t-1}$ : Interaction (Lag 1) |                          | 1515      |           |           |           |           |           |
| $p_{b,t-2} * v_{b,t-2}$ : Interaction (Lag 2) |                          | 1828      |           |           |           |           |           |
| $p_{b,t-3} * v_{b,t-3}$ : Interaction (Lag 3) |                          | 5879      |           |           |           |           |           |
| $p_{b,t-4} * v_{b,t-4}$ : Interaction (Lag 4) |                          | 3677      |           |           |           |           |           |
| <u>Under and Over Identification Tests</u>    |                          |           |           |           |           |           |           |
| Ho: Model is under identified                 |                          |           |           |           |           |           |           |
| Under-id $\chi^2(df)$                         | 44.10 (1)                | 25.27 (6) | 17.18 (2) | 33.66 (1) | 27.08 (1) | 13.58 (1) | 36.32 (1) |
| P-value                                       | < .000                   | < .000    | < .000    | < .000    | < .000    | < .000    | < .000    |
| Ho: Model is over identified                  |                          |           |           |           |           |           |           |
| Over-id $\chi^2(df)$                          | .                        | 7.23 (5)  | 0.48 (1)  | .         | .         | .         | .         |
| P-value                                       | .                        | 0.204     | 0.490     | .         | .         | .         | .         |
| <u>Clustering at the ATC4 level</u>           |                          |           |           |           |           |           |           |
|                                               | (4)                      | (5)       | (6)       | (4S)      | (4M)      | (4L)      | (4X)      |
| Endogenous Variable(s)                        | First-stage F-statistics |           |           |           |           |           |           |
| $g_{b,t-1}$ : Growth (Lag 1)                  | 54.33                    | 21.40     | 23.89     | 30.51     | 16.17     | 15.17     | 29.95     |
| $p_{b,t}$ : Products                          |                          | 49.31     | 48.58     |           |           |           |           |
| $v_{b,t}$ : Variety                           |                          | 88.42     | 198.89    |           |           |           |           |
| $p_{bt} * v_{bt}$ : Interaction               |                          | 90.75     | 54.19     |           |           |           |           |
| $p_{b,t-1}$ : Products (Lag 1)                |                          | 80.49     |           |           |           |           |           |
| $p_{b,t-2}$ : Products (Lag 2)                |                          | 90.57     |           |           |           |           |           |
| $p_{b,t-3}$ : Products (Lag 3)                |                          | 71.44     |           |           |           |           |           |
| $p_{b,t-4}$ : Products (Lag 4)                |                          | 71.57     |           |           |           |           |           |
| $v_{b,t-1}$ :Variety (Lag1)                   |                          | 109.8     |           |           |           |           |           |
| $v_{b,t-2}$ :Variety (Lag2)                   |                          | 79.19     |           |           |           |           |           |
| $v_{b,t-3}$ :Variety (Lag3)                   |                          | 71.93     |           |           |           |           |           |
| $v_{b,t-4}$ :Variety (Lag4)                   |                          | 77.17     |           |           |           |           |           |
| $p_{b,t-1} * v_{b,t-1}$ : Interaction (Lag 1) |                          | 104.6     |           |           |           |           |           |
| $p_{b,t-2} * v_{b,t-2}$ : Interaction (Lag 2) |                          | 127.4     |           |           |           |           |           |
| $p_{b,t-3} * v_{b,t-3}$ : Interaction (Lag 3) |                          | 73.21     |           |           |           |           |           |
| $p_{b,t-4} * v_{b,t-4}$ : Interaction (Lag 4) |                          | 50.32     |           |           |           |           |           |
| <u>Under and Over Identification Tests</u>    |                          |           |           |           |           |           |           |
| (Ho: Model is under identified)               |                          |           |           |           |           |           |           |
| Under-id $\chi^2(df)$                         | 77.82 (1)                | 79.79 (6) | 77.88(2)  | 61.62 (1) | 42.99 (1) | 18.71 (1) | 62.30 (1) |
| P-value                                       | < .000                   | < .000    | < .000    | < .000    | < .000    | < .000    | < .000    |
| (Ho: Model is over identified)                |                          |           |           |           |           |           |           |
| Over-id $\chi^2(df)$                          | .                        | 5.92 (5)  | 1.58 (1)  | .         | .         | .         | .         |
| P-value                                       | .                        | 0.314     | 0.209     | .         | .         | .         | .         |
